# Supplementary material for: Rapid quantification of cannabidiol from oils by direct analysis in real time mass spectrometry
Source: Royal Society of Chemistry journal article supplement (doi:10.1039/d2ay01229d), 2022-01-01
Supplement: d2ay01229d1.pdf [file d2ay01229d1.pdf]

## Rapid Quantification of Cannabidiol from Oils by means of Direct Analysis in Real Time Mass Spectrometry

### SUPPORTING INFORMATION

Susanne Huber<sup>a</sup>, Klemens Losso<sup>a</sup>, Günther K. Bonn<sup>a,b</sup> and Matthias Rainer<sup>a\*</sup>

<sup>a</sup> Institute of Analytical Chemistry and Radiochemistry, Leopold-Franzens University of Innsbruck,  
Innrain 80-82, A-6020 Innsbruck, Austria, [M.Rainer@uibk.ac.at](mailto:M.Rainer@uibk.ac.at)

<sup>b</sup> ADSI – Austrian Drug Screening Institute, Innrain 66a, A-6020 Innsbruck, Austria

**Tab.S1.** Results of the CBD quantification of the real samples using LC-MS and DART-MS including the bias between both methods.

| Sample code | LC-MS                    |         | DART-MS                  |         | Bias / % |
|-------------|--------------------------|---------|--------------------------|---------|----------|
|             | content of CBD / % (m/m) | RSD / % | content of CBD / % (m/m) | RSD / % |          |
| RWS1_5_01   | 4.56                     | 1.48    | 4.72                     | 4.21    | 3.7      |
| RWS1_5_02   | 5.19                     | 0.29    | 5.40                     | 5.94    | 4.1      |
| RWS1_5_03   | 4.97                     | 0.46    | 4.99                     | 3.72    | 0.3      |
| RWS2_5_01   | 5.15                     | 0.29    | 5.13                     | 2.82    | -0.2     |
| RWS2_5_02   | 4.75                     | 1.02    | 5.21                     | 6.96    | 9.8      |
| RWS2_5_03   | 5.21                     | 1.01    | 5.44                     | 6.01    | 4.4      |
| RWS3_10_01  | 11.29                    | 0.96    | 13.16                    | 9.01    | 16.6     |
| RWS3_10_02  | 11.15                    | 0.75    | 12.99                    | 7.06    | 16.5     |
| RWS3_10_03  | 11.65                    | 0.71    | 13.36                    | 3.42    | 14.6     |
| RWS4_10_01  | 8.39                     | 0.63    | 8.90                     | 7.33    | 6.1      |
| RWS4_10_02  | 9.75                     | 1.01    | 9.67                     | 5.65    | -0.8     |
| RWS4_10_03  | 10.31                    | 2.27    | 10.60                    | 5.65    | 2.8      |
| RWS5_15_01  | 14.13                    | 0.62    | 14.15                    | 5.55    | 0.2      |
| RWS5_15_02  | 14.61                    | 1.36    | 14.29                    | 4.04    | -2.2     |
| RWS5_15_03  | 14.52                    | 0.36    | 14.74                    | 11.29   | 1.5      |

**Tab.S2.** Validation parameters for the linear model of the LC-MS method.

| Calibration level / mg L <sup>-1</sup> | Bias / % | RSD / % |
|----------------------------------------|----------|---------|
| 20                                     | 2.1      | 1.5     |
| 40                                     | -1.4     | 1.9     |
| 60                                     | -1.8     | 1.8     |
| 80                                     | -0.9     | 3.4     |
| 100                                    | 1.9      | 3.0     |

**Tab.S3.** Validation parameters for the determination of LOD and LOQ.

| <b>Calibration level / mg L<sup>-1</sup></b> | <b>Bias / %</b> | <b>RSD / %</b> |
|----------------------------------------------|-----------------|----------------|
| 2                                            | -2.2            | 2.7            |
| 4                                            | 2.2             | 5.0            |
| 6                                            | -0.4            | 12.5           |
| 8                                            | 2.6             | 6.1            |
| 10                                           | -2.3            | 4.7            |

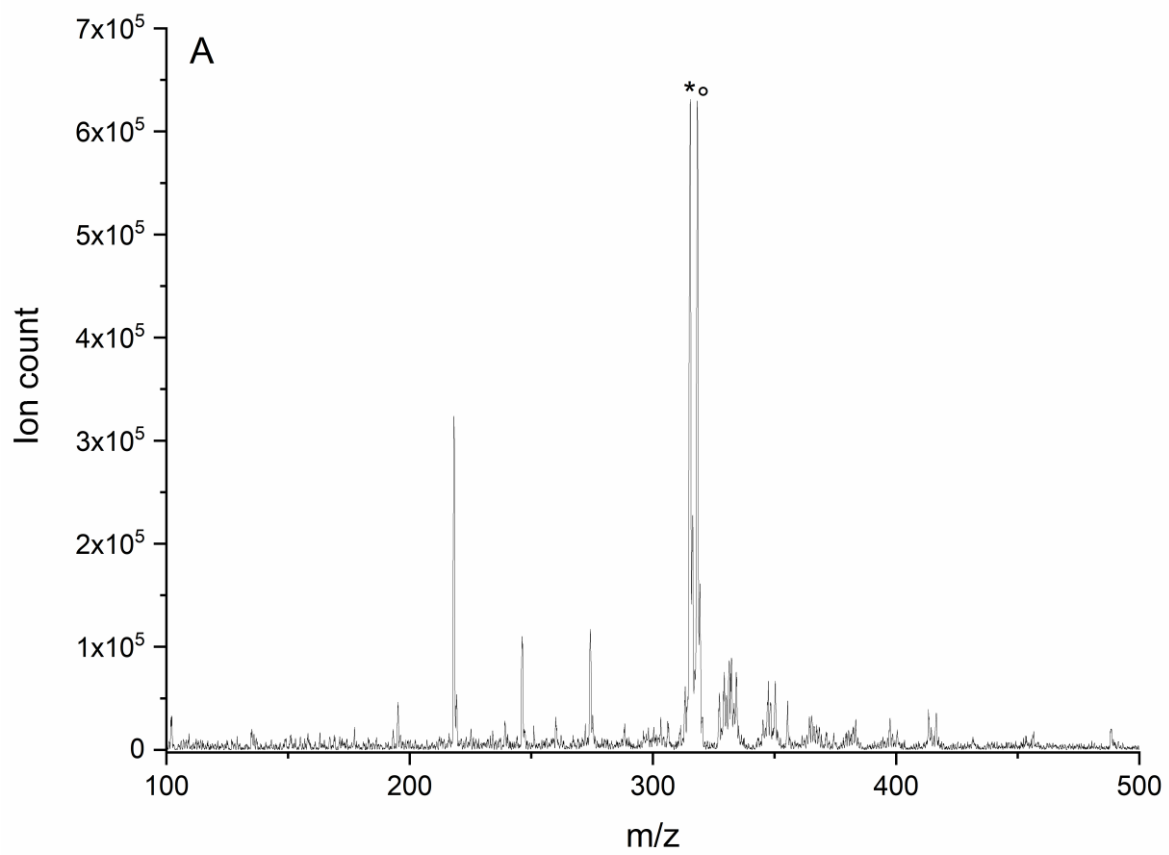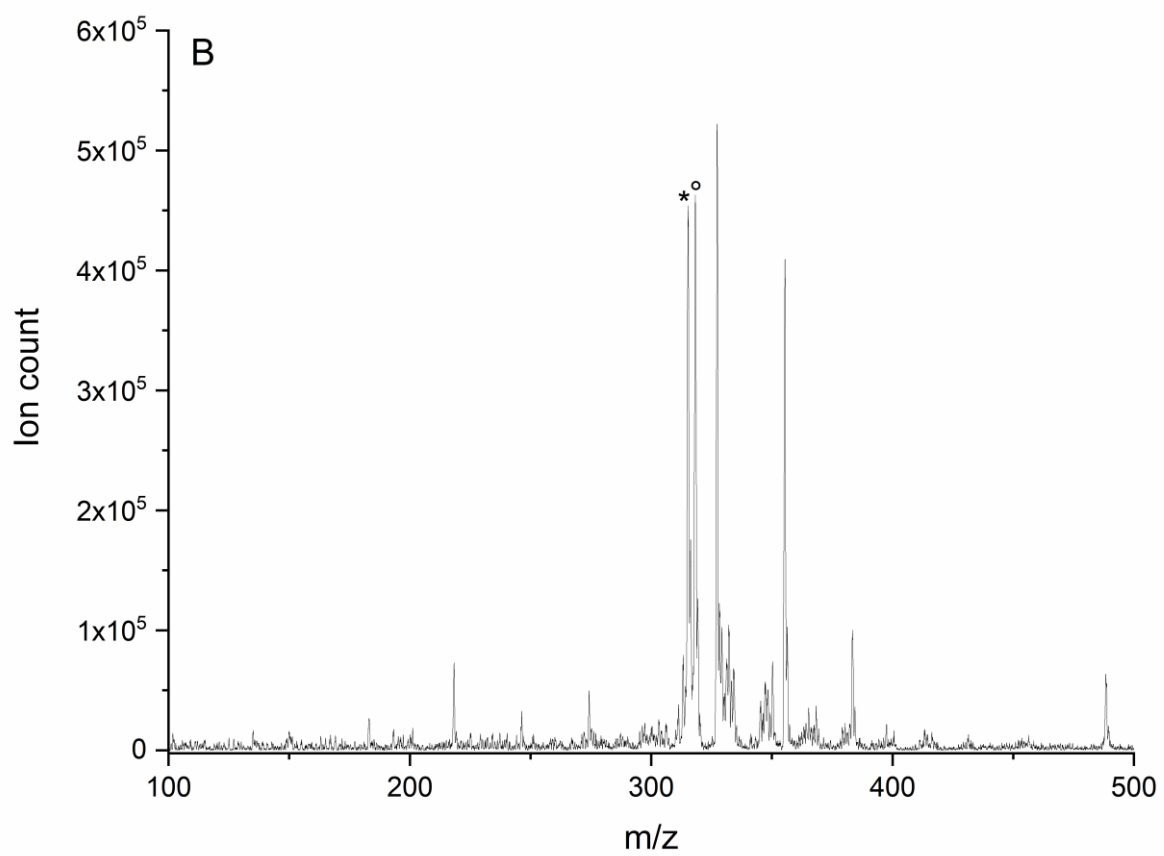

**Fig.S1.** DART mass spectra of real samples RWS1\_5 (A) and RWS2\_5 (B). Peaks of CBD (\*) and CBD-D<sub>3</sub> (°) are marked.

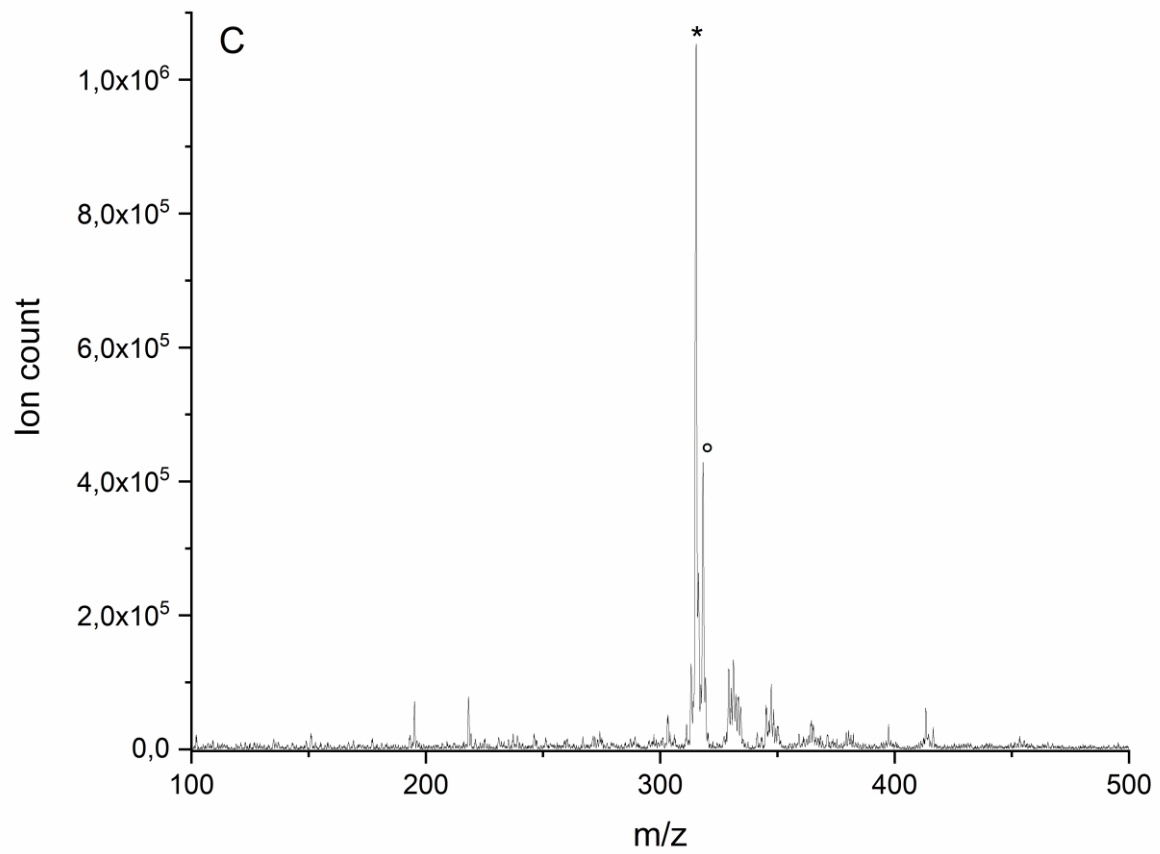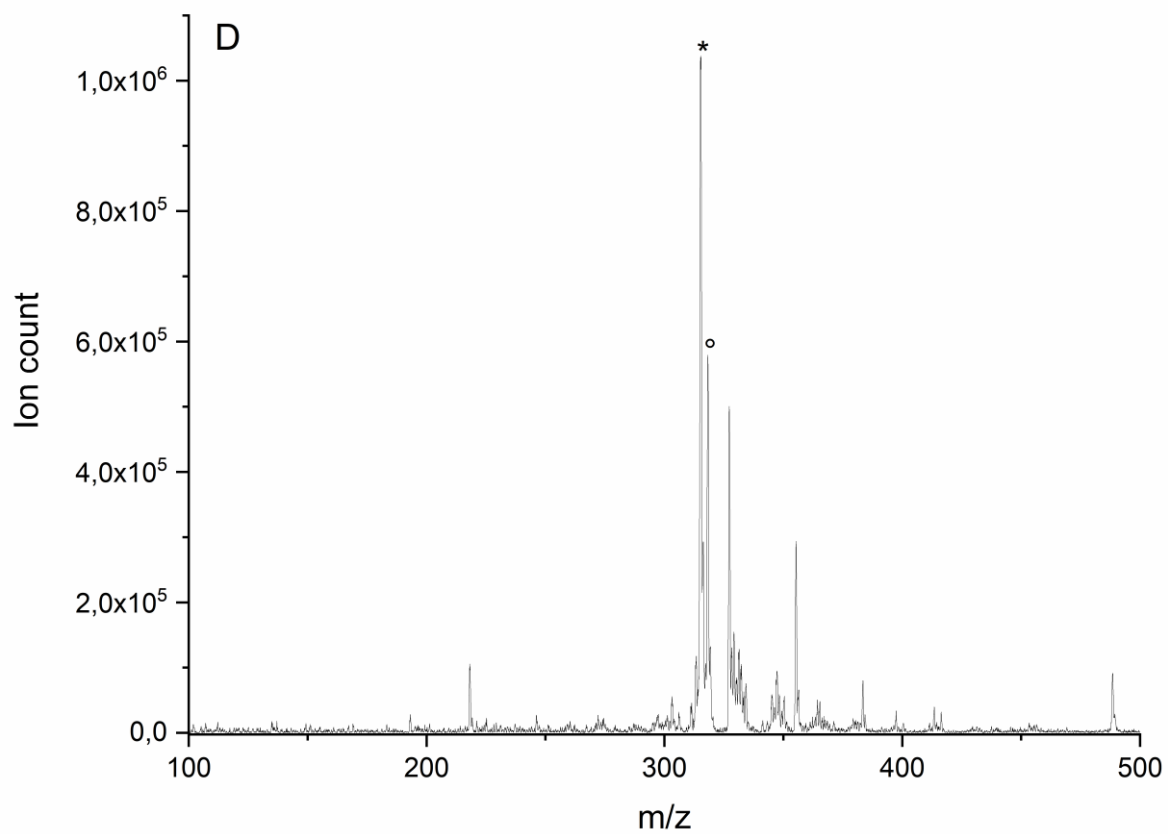

**Fig.S2.** DART mass spectra of real samples RWS3\_10 (C) and RWS4\_10 (D). Peaks of CBD (\*) and CBD-D<sub>3</sub> (°) are marked.

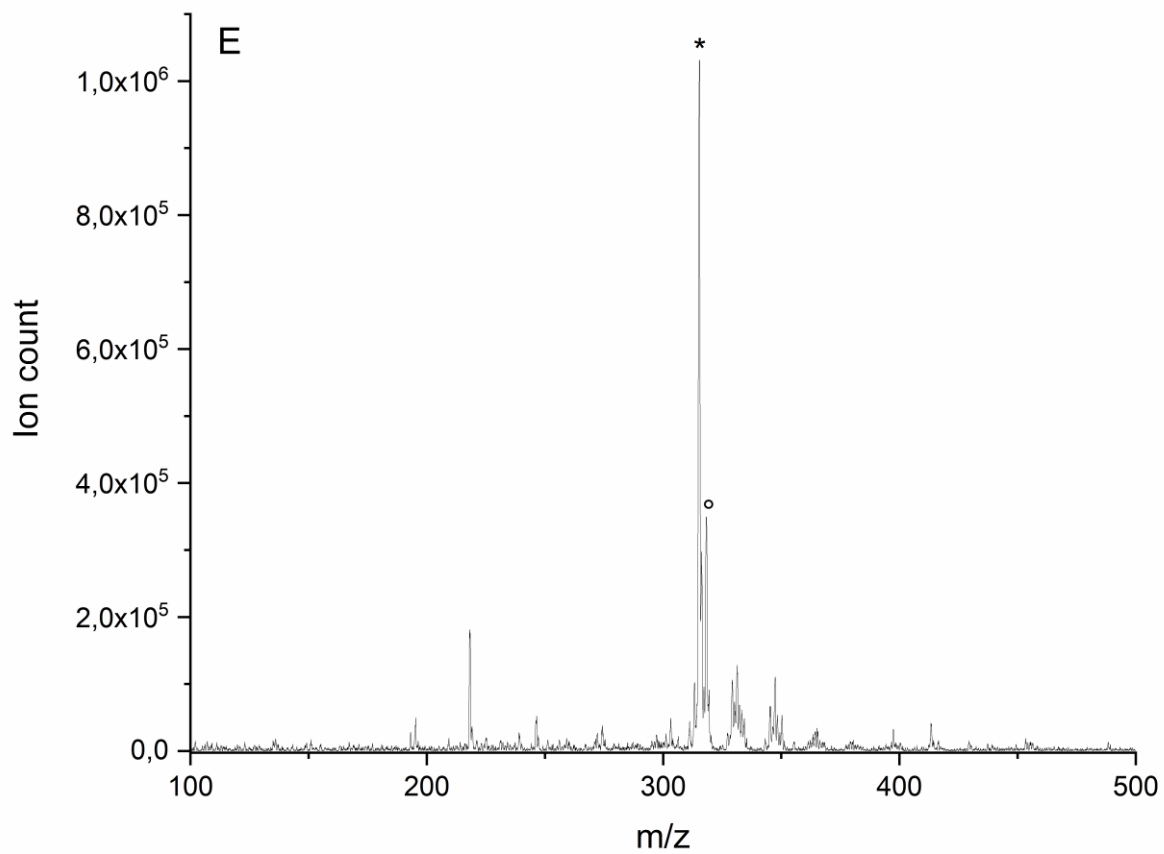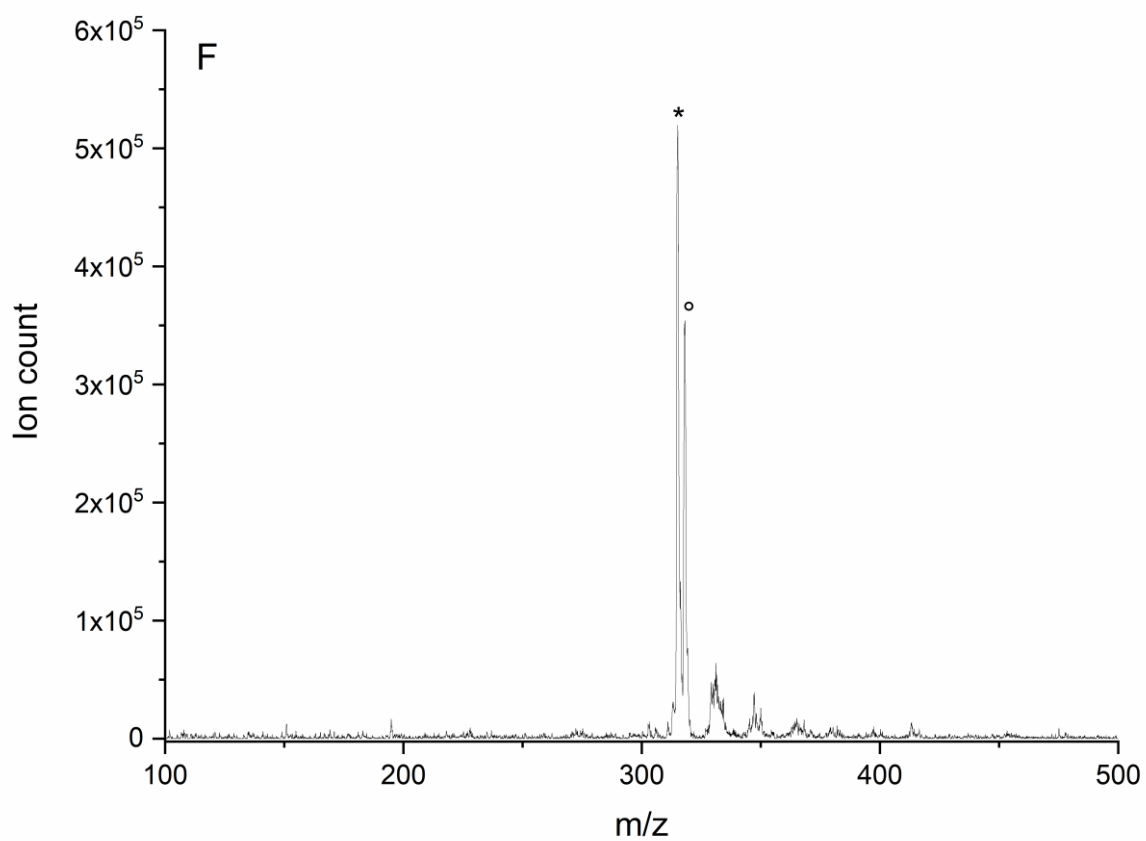

**Fig.S3.** DART mass spectra of real sample RWS5\_10 (E) and spiked sample CBD\_30 (F). Peaks of CBD (\*) and CBD-D<sub>3</sub> (°) are marked.
